# Supplementary material for: Development, implementation and evaluation of a hybrid study program for sustainability competencies and future skills
Source: Frontiers journal article supplement (doi:10.3389/feduc.2025.1568233), 2025-06-18

**Supplementary material**

Table 7 Own interest in the study program results

| **Own interest in the study program** | | |
| --- | --- | --- |
| **Response selection** | **Number of responses** | **Percentage %** |
| absolutely | 25 | 17,48 |
| yes | 47 | 32,87 |
| medium | 36 | 25,17 |
| no | 17 | 11,89 |
| absolutely not | 14 | 9,79 |
| No answer | 4 | 2,80 |

Table 8 General interest in the study program results

| **General interest in the study program** | | |
| --- | --- | --- |
| **Response selection** | **Number of responses** | **Percentage %** |
| large | 25 | 17,48 |
| big | 55 | 38,46 |
| medium | 47 | 32,87 |
| little | 8 | 5,59 |
| very small | 8 | 5,59 |
| no answer | 5 | 3,50 |

Table 9 Interest by their own employers results

| **Interest by their own employers** | | |
| --- | --- | --- |
| **Response selection** | **Number of responses** | **Percentage %** |
| large | 18 | 18 |
| big | 33 | 33 |
| medium | 28 | 28 |
| little | 14 | 14 |
| very small | 7 | 7 |
| no answer | 15 | 15 |

Table 10 Time preferences results

| **Time preferences** | | |
| --- | --- | --- |
| **Response selection** | **Number of responses** | **Percentage %** |
| Next to working | 45 | 31,47 |
| Full time | 35 | 24,48 |
| During the day and work week | 12 | 8,39 |
| In the evening | 16 | 11,19 |
| On the weekends | 13 | 9,09 |
| In block (e.g. several weeks/ weekends in the semester are reserved for studying) | 22 | 15,38 |

Table 11 Place and setup of study results

| **Place and setup of study** | | |
| --- | --- | --- |
| **Response selection** | **Number of responses** | **Percentage %** |
| in place at the campus in Sigmaringen or Albstadt | 28 | 17,18 |
| in place at the campus in another smaller town | 10 | 6,13 |
| in place at the campus of a bigger city, for example Stuttgart, Berlin or in another country | 27 | 16,56 |
| Completely via digital media (video conference, etc.) | 23 | 14,11 |
| Online courses with close personal support and accompanying attendance weeks (e.g. twice a semester) at the Sigmaringen campus | 25 | 15,34 |
| Online courses with close personal support and accompanying attendance weekends (e.g. 4x per semester) at the campus in Sigmaringen | 23 | 14,11 |
| Online courses with accompanied meetings at a central place, for example Stuttgart | 23 | 14,11 |
| No answer | 2 | 1,23 |
| Other | 2 | 1,23 |

Table 12 Mobile and flexible study setup results

| **Mobile and flexible study setup** | | |
| --- | --- | --- |
| **Response selection** | **Number of responses** | **Percentage %** |
| absolutely | 21 | 25,93 |
| yes | 37 | 45,68 |
| medium | 17 | 20,99 |
| no | 2 | 2,47 |
| absolutely not | 1 | 1,23 |
| no answer | 3 | 3,70 |

# **Questionnaire in its original language (German)**

**Alumni Umfrage neuer Studiengang**

In dieser Umfrage sind 16 Fragen enthalten.

**Zustimmung Datenverarbeitung**

***Sie haben in der folgenden Umfrage die Möglichkeit, Fragen nicht zu beantworten bzw. Sie können Fragen überspringen.***

***Die Teilnahme an der Umfrage ist anonym, da keine persönlichen Identifikationsdaten erhoben werden. Rückschlüsse auf einzelne Befragte sind in der Regel nicht möglich. Es werden jedoch demografische Daten erhoben, anhand derer ein Personenbezug nicht gänzlich ausgeschlossen werden kann. Hiermit willige ich in die daraus resultierende Datenverarbeitung ein (Art. 6 Abs. 1 lit. a DSGVO). Die Einwilligung erfolgt freiwillig und ist jederzeit mit Wirkung für die Zukunft widerrufbar. Bitte beachten Sie, dass ein Widerruf jedoch nur dann wirksam möglich ist, sofern dieser einem konkretem Datensatz zugeordnet werden kann. Ihren Widerruf richten Sie bitte direkt an die Kontaktdaten des/der Umfrageerstellers*in, oder an den Datenschutzbeauftragten. Weitere Hinweise zum Datenschutz entnehmen Sie bitte der*** [***Datenschutzerklärung***](https://www.hs-albsig.de/datenschutz/datenschutzerklaerung-online-umfragen/)***.* ***

Bitte wählen Sie eine der folgenden Antworten:

- Ich stimme zu

**Vorstellung neuer Master-Studiengang**

Liebe Alumna, lieber Alumnus,
 Unsere Zukunft geht uns alle an. Liegt auch Ihnen unsere Zukunft am Herzen und möchten Sie dazu beitragen, die Zukunft lebenswert zu gestalten? Vielleicht sogar in Ihrem Beruf? Dafür starten wir einen neuen Masterstudiengang an der Hochschule Albstadt-Sigmaringen!

In dem neuen Studiengang „Sustainability Studies“ werden Sie an einem konkreten anwendungsbezogenen Projekt studieren und an hochaktuellen berufsbezogenen Fragestellungen arbeiten. Sie werden also Lösungen für den Alltag in Unternehmen und darüber hinaus erarbeiten und damit nachhaltige Entwicklung vorantreiben.

Studierende bewerben sich mit einer Projektidee, werden aber mit dem Matchmaking unterstützt falls noch keine (fertige) Idee vorliegt. Dafür arbeiten wir eng mit Unternehmen zusammen. Die Projektinhalte werden begleitet durch Module zum wissenschaftlichen Arbeiten, Projektmanagement und zu fachlichen Themen. Ein umfangreicher Wahlkatalog steht dafür zur Verfügung. Wir ermöglichen dabei ein Studium in enger Vereinbarkeit mit einer Berufstätigkeit, teilweise online und auf Englisch. Abgeschlossen wird das Studium mit der Masterarbeit.

**Klingt ein solches Studienangebot für Sie attraktiv? Wenn möglich, begründen Sie mit einigen Stichworten Ihre Auswahl**

Bitte wählen Sie eine der folgenden Antworten:

Bitte wählen Sie nur eine der folgenden Antworten aus:

- absolut
- ja
- mittelmäßig
- nein
- überhaupt nicht

Bitte schreiben Sie einen Kommentar zu Ihrer Auswahl

**Wie möchten Sie zeitlich gesehen studieren oder wie hätten Sie gerne studiert? (Mehrfachnennung möglich)**

Wählen Sie alle zutreffenden Optionen

Bitte wählen Sie alle zutreffenden Antworten aus:

- Neben dem Beruf (Teilzeit)
- Vollzeitstudium
- Tagsüber und unter der Woche (regulär)
- Abends
- Am Wochenende
- Im Block (z.B. mehrere Wochen/ Wochenenden im Semester sind für das Studium reserviert)

**Was spricht Sie an dem Studiengang besonders an, was eventuell weniger?**

Bitte wählen Sie die zutreffende Antwort für jeden Punkt aus:

|  | Spricht mich an | Unsicher | Spricht mich nicht an |
| --- | --- | --- | --- |
| Nachhaltigkeit |  |  |  |
| Interdisziplinarität |  |  |  |
| Projektorientierung |  |  |  |
| Viele Wahlmöglichkeiten |  |  |  |
| Studium an der HS Albstadt-Sigmaringen |  |  |  |
| Enge Bindung zu Unternehmen/ Forschungseinrichtungen |  |  |  |
| Flexibel studieren (Teilzeit, neben dem Beruf, teilweise online...) |  |  |  |

**Unser Studiengang soll die nachhaltige Entwicklung in einem bestimmten Fachbereich und für eine nachhaltige Gesellschaft vorantreiben. Wie schätzen Sie allgemein das Interesse für einen solchen Studiengang ein? Begründen Sie gerne im Kommentarfeld Ihre Antwort.**

Bitte wählen Sie eine der folgenden Antworten:

Bitte wählen Sie nur eine der folgenden Antworten aus:

- sehr groß
- groß
- mittelmäßig
- gering
- sehr gering

Bitte schreiben Sie einen Kommentar zu Ihrer Auswahl

**Wie groß ist -Ihrer Einschätzung nach- das Interesse Ihres Arbeitgebers, ein Projekt mit Nachhaltigkeitsbezug anzubieten und in enger Kooperation mit Studierenden bearbeiten zu lassen? Bitte begründen Sie Ihre Antwort (optional).**

Bitte wählen Sie eine der folgenden Antworten:

Bitte wählen Sie nur eine der folgenden Antworten aus:

- sehr groß
- groß
- mittelmäßig
- gering
- sehr gering

Bitte schreiben Sie einen Kommentar zu Ihrer Auswahl

**Haben Sie Interesse, einen solchen Master an der HS Albstadt-Sigmaringen zu belegen, idealerweise in Kooperation mit Ihrem jetzigen oder zukünftigen Arbeitgeber? Bitte begründen Sie Ihre Antwort (optional)**

Bitte wählen Sie eine der folgenden Antworten:

Bitte wählen Sie nur eine der folgenden Antworten aus:

- ja
- nein
- unentschlossen

Bitte schreiben Sie einen Kommentar zu Ihrer Auswahl

**Welches Interesse haben Sie & welche Möglichkeit sehen Sie generell, sich bei Ihrem Arbeitgeber für Nachhaltigkeitsthemen weiter zu qualifizieren?**

Wählen Sie alle zutreffenden Optionen

Bitte wählen Sie alle zutreffenden Antworten aus:

- großes Interesse, viele Möglichkeiten
- großes Interesse, wenig Möglichkeiten
- wenig Interesse, viele Möglichkeiten
- wenig Interesse, wenig Möglichkeiten
- Sonstiges:

**Wie und wo möchten Sie studieren oder hätten Sie gerne studiert? Wählen Sie eine oder zwei bevorzugte Möglichkeiten aus oder geben Sie optional im Textfeld an, was Ihnen bzgl. der Studienform sonst noch wichtig ist**

Wählen Sie alle zutreffenden Optionen

Bitte wählen Sie alle zutreffenden Antworten aus:

- in Präsenz am Campus in Sigmaringen bzw. Albstadt
- in Präsenz am Campus einer anderen kleineren Stadt
- in Präsenz am Campus einer größeren Stadt, z.B. Stuttgart, Berlin oder auch im Ausland
- Vollständig über digitale Medien (Videokonferenz, etc.)
- Onlinekurse mit enger persönlicher Betreuung und begleitenden Präsenzwochen (z.B. 2x im Semester) am Campus in Sigmaringen
- Onlinekurse mit enger persönlicher Betreuung und begleitenden Präsenzwochenenden (z.B. 4x im Semester) am Campus in Sigmaringen
- Onlinekurse mit begleitenden Präsenzterminen an einem zentral gelegenen Ort, z.B. Stuttgart
- Keine Antwort
- Sonstiges:

**Wir möchten das Studieren in ihr (Berufs-)Leben integrieren: Die Universität haben Sie in Ihrer Tasche auf dem Handy immer dabei. Sie können studieren, wann und wo sie wollen – und haben auch immer Zugriff auf die Unterlagen Ihres Studiengangs. Begleitet wird dieses Studiengangskonzept durch Präsenztermine. Spricht Sie ein solches Konzept an und was wäre Ihnen bei einem solchen Konzept besonders wichtig?**

Bitte wählen Sie eine der folgenden Antworten:

Bitte wählen Sie nur eine der folgenden Antworten aus:

- absolut
- ja
- mittelmäßig
- nein
- überhaupt nicht

Bitte schreiben Sie einen Kommentar zu Ihrer Auswahl

Zum Abschluss noch ein paar allgemeine Fragen:

**Aus welcher Fächergruppe ist Ihr letzter oder gerade angestrebter Hochschulabschluss?**

Bitte wählen Sie eine der folgenden Antworten:

Bitte wählen Sie nur eine der folgenden Antworten aus:

- Agrar- und Forstwissenschaften
- Gesellschafts- und Sozialwissenschaften
- Informatik
- Ingenieurwissenschaften
- Kunst, Musik, Design
- Lehramt
- Mathematik, Naturwissenschaften
- Medizin, Gesundheitswissenschaften
- Öffentliche Verwaltung
- Sprach- und Kulturwissenschaften
- Wirtschafts- und Rechtswissenschaften
- Sonstiges

**Was ist Ihr höchster Bildungsabschluss?**

Bitte wählen Sie eine der folgenden Antworten:

Bitte wählen Sie nur eine der folgenden Antworten aus:

- Abitur/ Fachhochschulreife
- Abgeschlossene Berufsausbildung
- Bachelor
- Master
- Promotion

**In welcher Branche sind Sie aktuell tätig?**

Bitte wählen Sie eine der folgenden Antworten:

Bitte wählen Sie nur eine der folgenden Antworten aus:

- Aktuell im Studium
- Agrarwirtschaft
- Bau
- Chemie und Rohstoffe
- Dienstleistungen und Handwerk
- Handel/ E-Commerce
- Energie und Umwelt
- Finanzen, Versicherungen und Immobilien
- Gesellschaft
- IT/ Telekommunikation
- Medien, Marketing
- Metall und Elektronik
- Pharma und Gesundheit
- Politik
- Tourismus/ Gastronomie
- Verkehr und Logistik
- Sonstiges

**In welcher Rolle sind Sie aktuell tätig?**

Bitte geben Sie Ihre Antwort hier ein:

**Welcher Altergruppe gehören Sie an?**

Bitte wählen Sie eine der folgenden Antworten:

Bitte wählen Sie nur eine der folgenden Antworten aus:

- <20
- 20-30
- 31-40
- 41+

**Welchem Geschlecht ordnen Sie sich zu?**

Bitte wählen Sie eine der folgenden Antworten:

Bitte wählen Sie nur eine der folgenden Antworten aus:

- weiblich
- männlich
- divers

Vielen Dank für Ihre Teilnahme!
 Bei Interesse finden Sie hier weitere Informationen zum Studiengang: www.hs-albsig.de/sus
 Kontakt: -Email-

# **Curriculum overview**


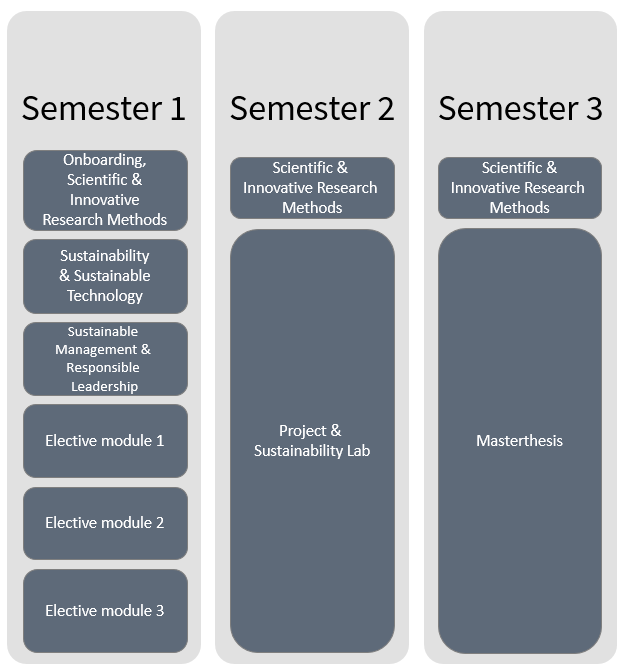


# **Part of the survey results for one of the mandatory modules, Sustainability and Sustainable Technology, at the end of the semester**


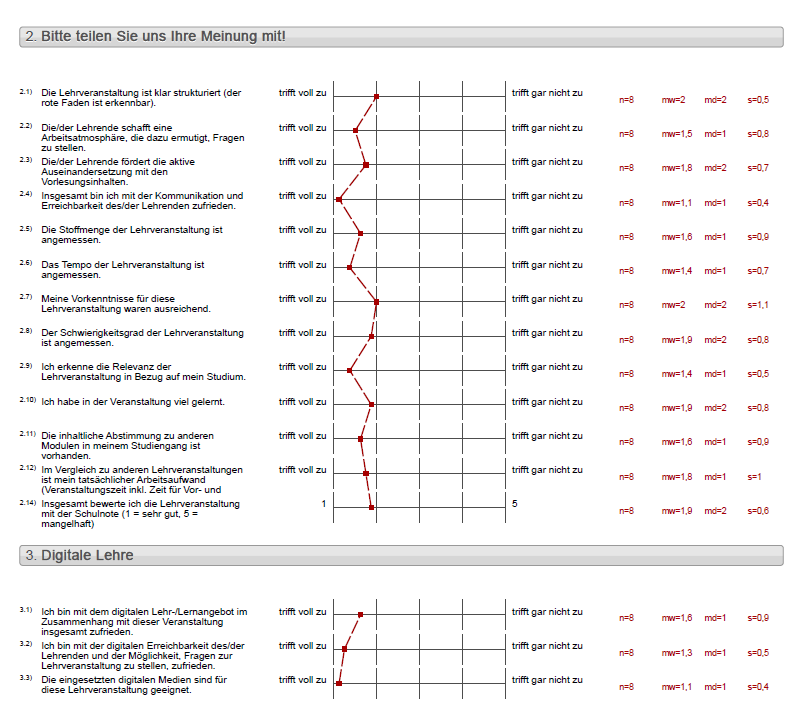

Supplement: Data_Sheet_1.docx [file Data_Sheet_1.docx]
